# Supplementary material
Source: publisher figshare collection journal article supplement (https://acs.figshare.com/ndownloader/files/7859959)
Supplement: Supplementary file 1 [file 7859959]

## SUPPLEMENTARY DATA

**Table S1.** Summary of the reductions of Hg contents in the bioaccessible fraction obtained after the gastrointestinal digestion of standards solutions [1 mg/L of Hg(II) or methylmercury (CH<sub>3</sub>Hg)] or food with the addition of various strains of *Saccharomyces cerevisiae*. Values of the bioaccessible fraction expressed as ng/mL of standard solution or ng/g of food.

| Samples                     | Conditions of the gastrointestinal digestion | Bioaccessible fraction | Reduction    |
|-----------------------------|----------------------------------------------|------------------------|--------------|
| Standard Hg(II)             | w/o yeast                                    | 9200 ± 7 <sup>a</sup>  | 78-96%       |
|                             | w/yeasts<br>All <i>S. cerevisiae</i> strains | 404-2241 <sup>b</sup>  |              |
| Standard CH <sub>3</sub> Hg | w/o yeast                                    | 8432 ± 57 <sup>a</sup> | 64-96%       |
|                             | w/yeasts<br>All <i>S. cerevisiae</i> strains | 324-3028 <sup>b</sup>  |              |
| Swordfish                   | w/o yeast                                    | 518 ± 30 <sup>a</sup>  | No reduction |
|                             | w/yeast<br>strains VRB, T73 and Ultralevura  | 519-628 <sup>b</sup>   |              |
| Mushroom                    | w/o yeast                                    | 427 ± 29 <sup>a</sup>  | 55-74%       |
|                             | w/yeast<br>strains VRB, T73 and Ultralevura  | 112-193 <sup>b</sup>   |              |

<sup>a</sup> Contents of Hg in the bioaccessible fraction obtained after applying the in vitro digestion to standard solutions or foods in the absence of *Saccharomyces cerevisiae*. Values expressed as mean ± SD (n=3)

<sup>b</sup> Contents of Hg in the bioaccessible fraction obtained after applying the in vitro digestion to standard solution or food in the presence of several strains of *Saccharomyces cerevisiae*. Values expressed as the range of the means of several assays.

**Table S2.** Summary of the effects of several compounds [cysteine (Cys), albumin (BSA), copper (Cu) or calcium (Ca)] on the retention of Hg by *Saccharomyces cerevisiae* BY4741 during the gastrointestinal digestion of standards solutions [1 mg/L of Hg(II) or methylmercury (CH<sub>3</sub>Hg)]. Values expressed as ng of Hg (mean  $\pm$  SD, n=3).

| Samples                     | Conditions of the gastrointestinal digestion | Yeast retention |
|-----------------------------|----------------------------------------------|-----------------|
| Standard Hg(II)             | w/yeasts<br>w/o Cys or BSA                   | 3932 $\pm$ 337  |
|                             | w/yeasts<br>w/Cys                            | 152 $\pm$ 16    |
|                             | w/yeasts<br>w/BSA                            | 1342 $\pm$ 65   |
|                             |                                              |                 |
| Standard CH <sub>3</sub> Hg | w/yeast<br>w/o Cys or BSA                    | 6271 $\pm$ 103  |
|                             | w/yeasts<br>w/Cys                            | 39 $\pm$ 7      |
|                             | w/yeasts<br>w/BSA                            | 4272 $\pm$ 34   |
|                             |                                              |                 |
| Standard Hg(II)             | w/yeasts<br>w/o cations                      | 6762 $\pm$ 267  |
|                             | w/yeasts<br>w/Ca                             | 5761 $\pm$ 476  |
|                             | w/yeasts<br>w/Cu                             | 4577 $\pm$ 192  |
|                             |                                              |                 |
